# Supplementary material for: Strain profiling and epidemiology of bacterial species from metagenomic sequencing
Source: PubMed Central journal article supplement (PMC5741664; doi:10.1038/s41467-017-02209-5), 2017-12-22
Supplement: 41467_2017_2209_MOESM1_ESM.pdf [file 41467_2017_2209_MOESM1_ESM.pdf]

# Supplementary Figures

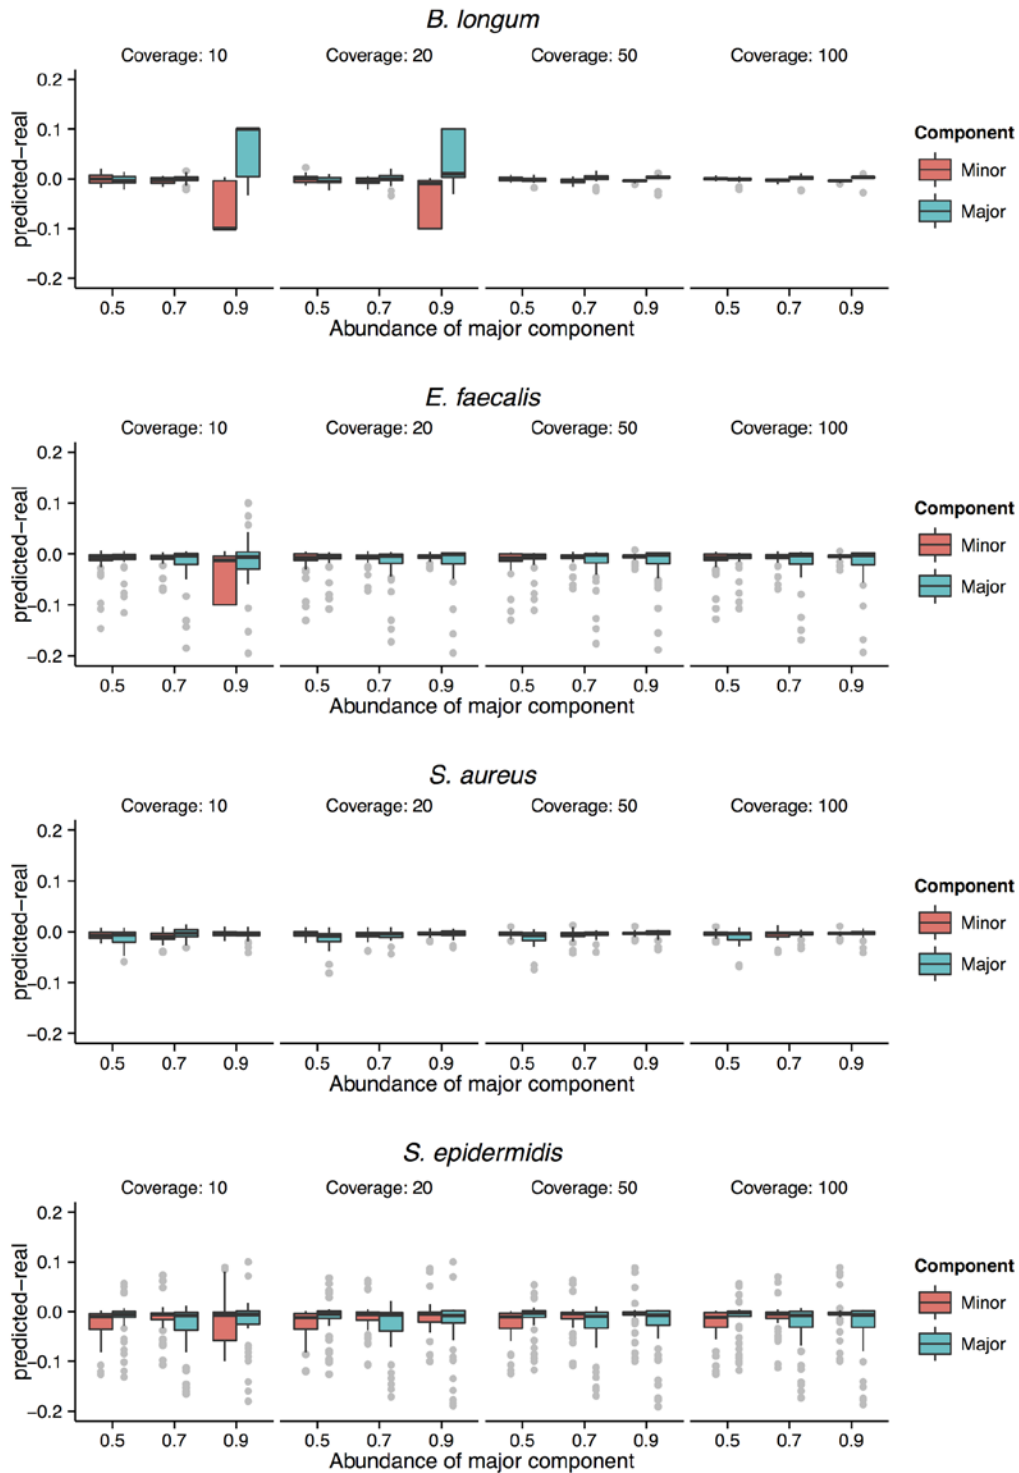

Supplementary Fig. 1. Difference between the predicted and real relative abundances for the *syntheticII* dataset plotted as a function of the abundance of the major (dominant) component. Boxes indicate the 25% and 75% percentiles while whiskers extend to the highest (lowest) value that is within 1.5 times the inter-quartile range. Outliers are shown as grey dots.

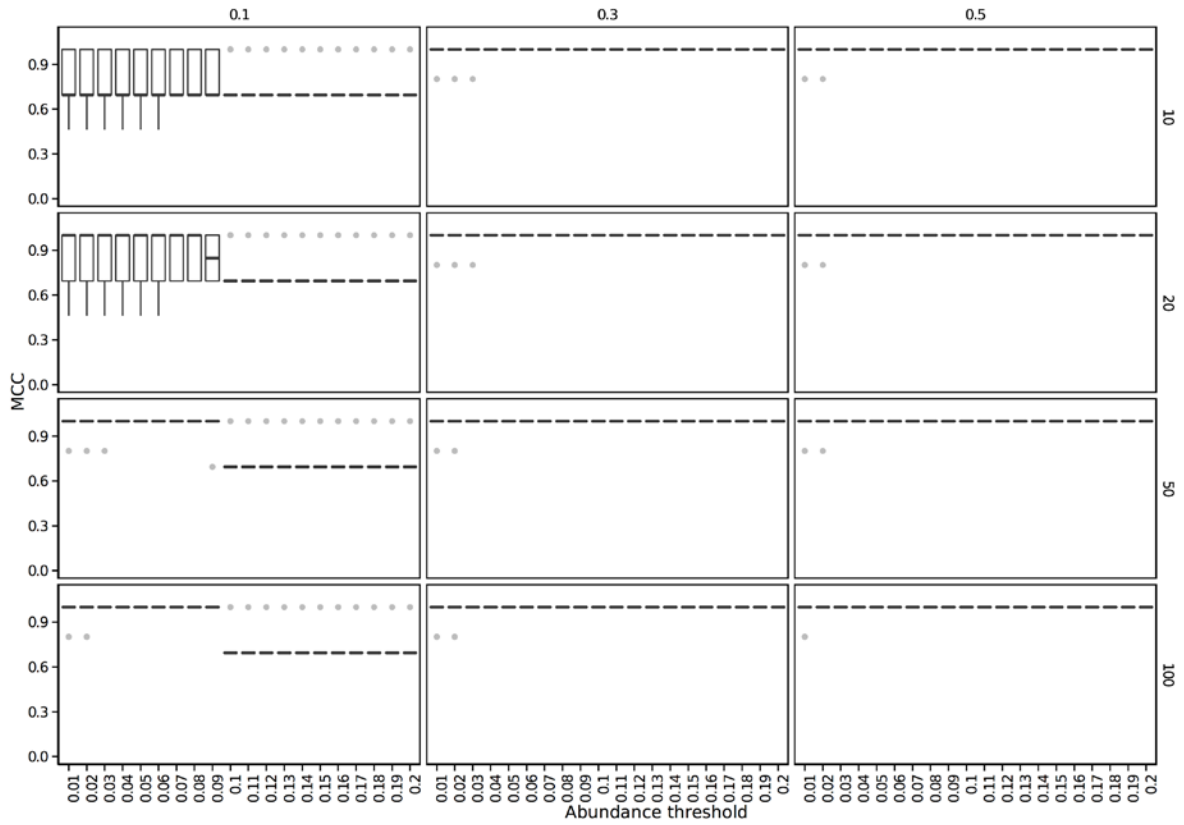

Supplementary Fig. 2. *syntheticII* dataset - *B. longum*. Matthew Correlation Coefficient of the strains predicted by StrainEst for the 12 different samples with relative abundances 90%-10% (left column), 70%-30% (center column) and 50%-50% (right column) and coverage 10X (top row), 20X (second top row), 50X (third row), and 100X (bottom row). Strains are considered predicted positive if their predicted relative abundance exceeds a given threshold. The plotted data are for values of the threshold between 0.01 and 0.2. Boxes indicate the 25% and 75% percentiles while whiskers extend to the highest (lowest) value that is within 1.5 times the inter-quartile range. Outliers are shown as grey dots.

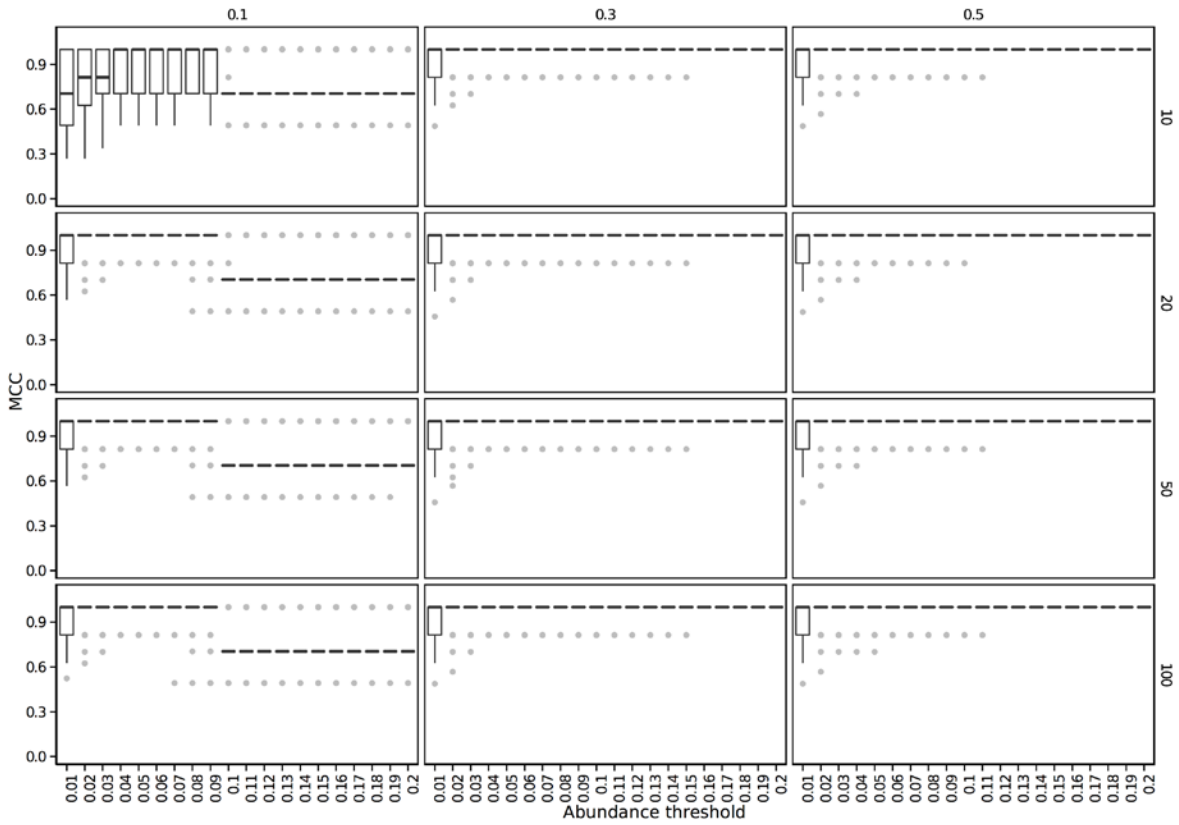

Supplementary Fig. 3. *syntheticII* dataset - *E. faecalis*. Same as Supplementary Fig. 2.

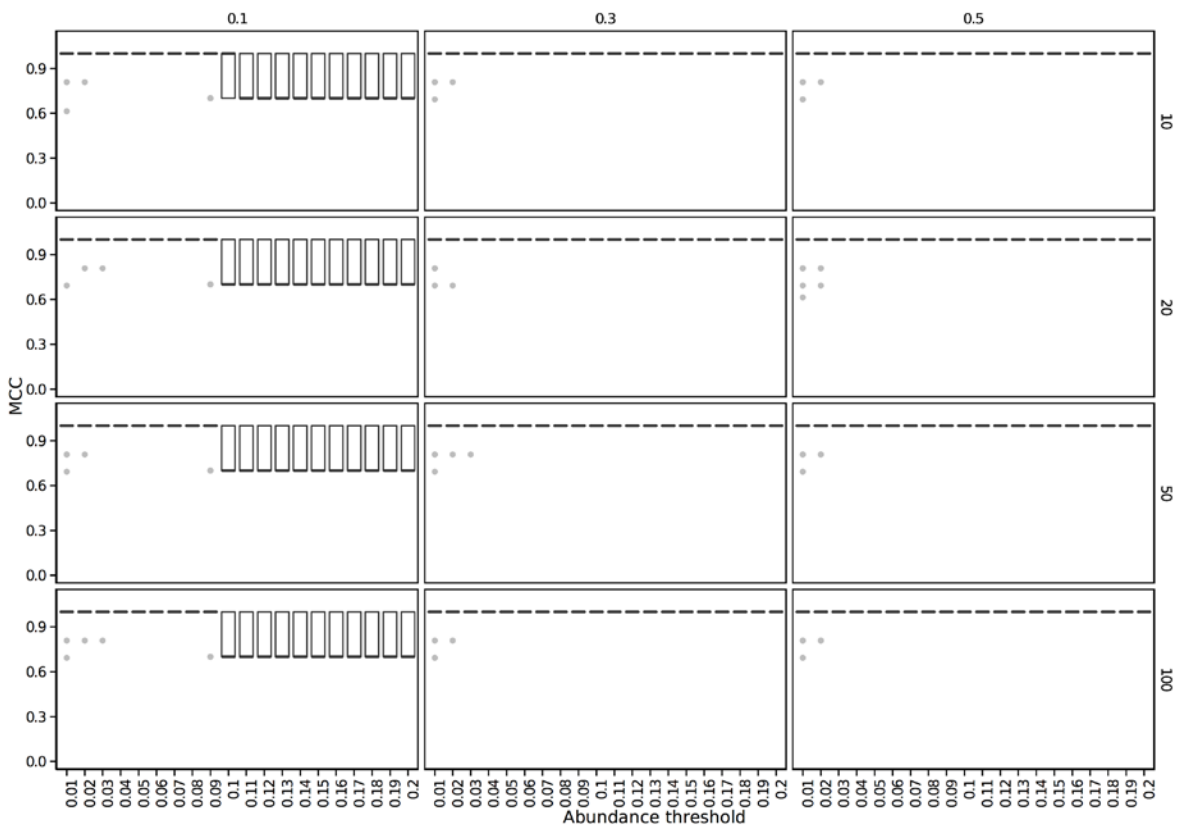

Supplementary Fig. 4. *syntheticII* dataset - *S. aureus*. Same as Supplementary Fig. 2.

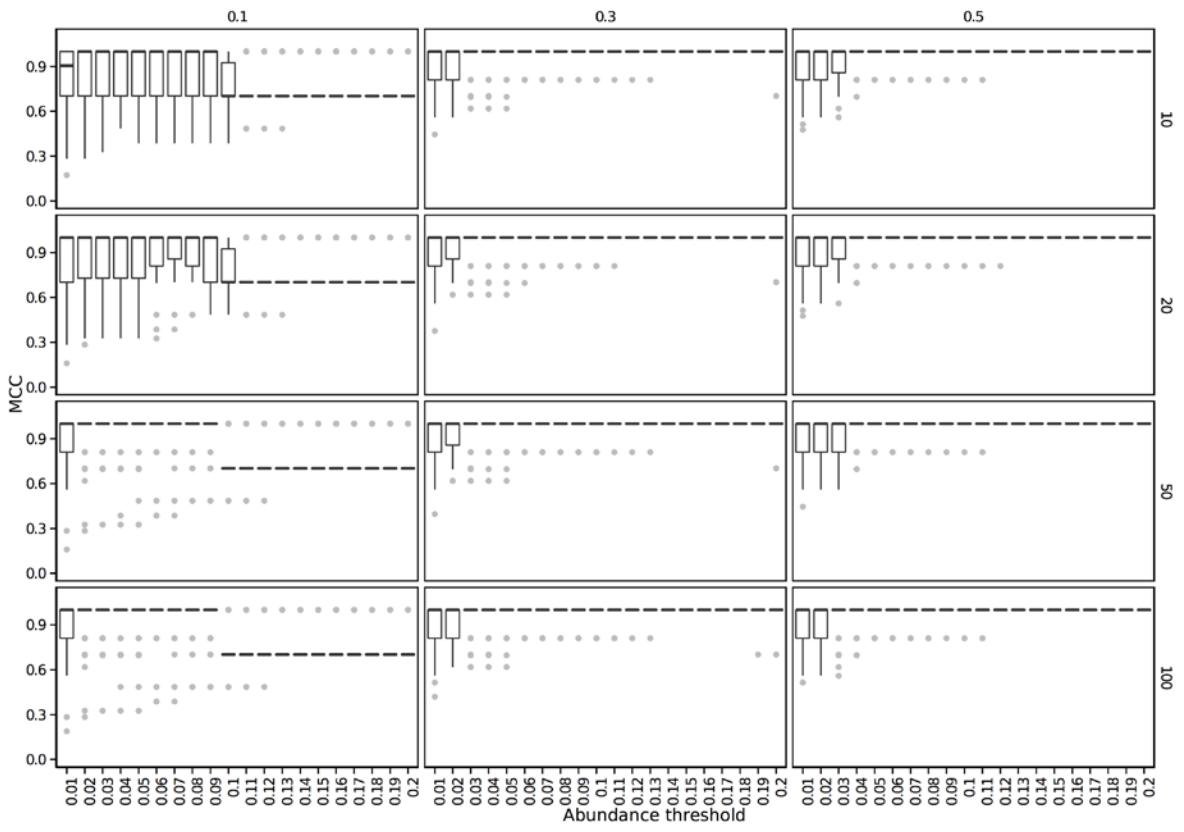

Supplementary Fig. 5. *syntheticII* dataset - *S. epidermidis*. Same as Supplementary Fig. 2.

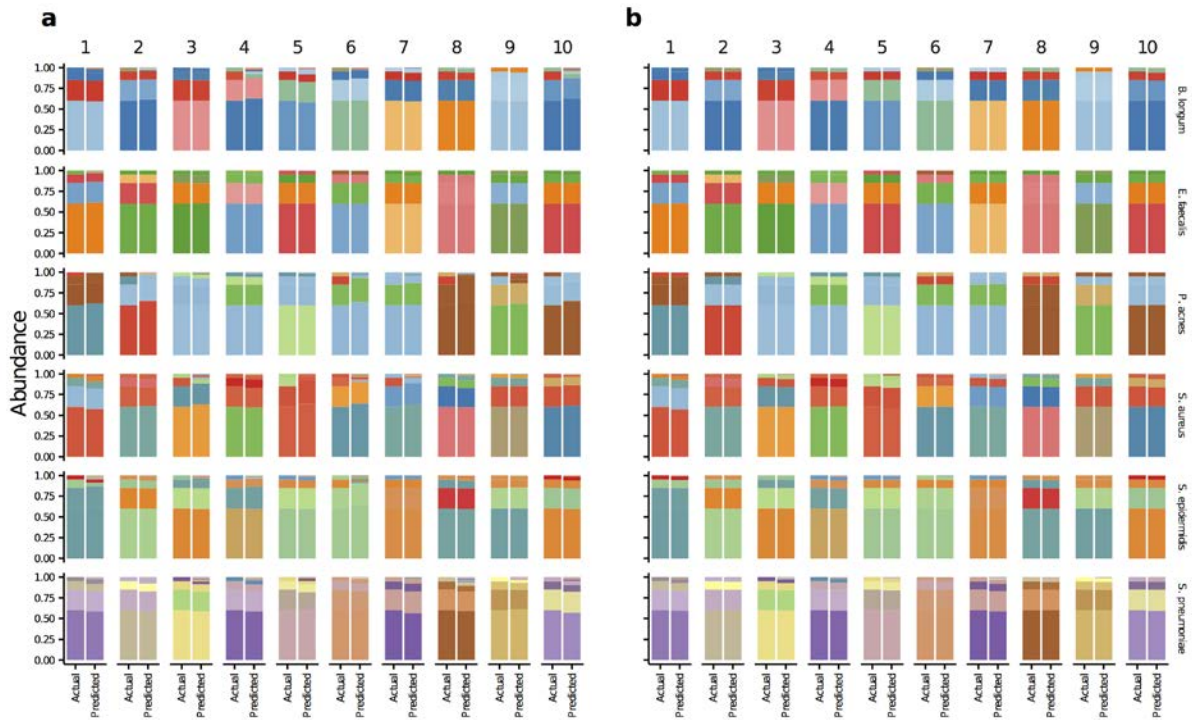

Supplementary Fig. 6. *syntheticIV* dataset. Comparison between actual and predicted relative abundances for *B. longum*, *E. faecalis*, *P. acnes*, *S. aureus*, *S. epidermidis*, and *S. pneumoniae*. For each species, we simulated 10 synthetic datasets at coverage 10X (a) and 100X (b) generating reads from four strains mixed at variable relative abundances (60-25-10-5%). Colors indicate different strains.

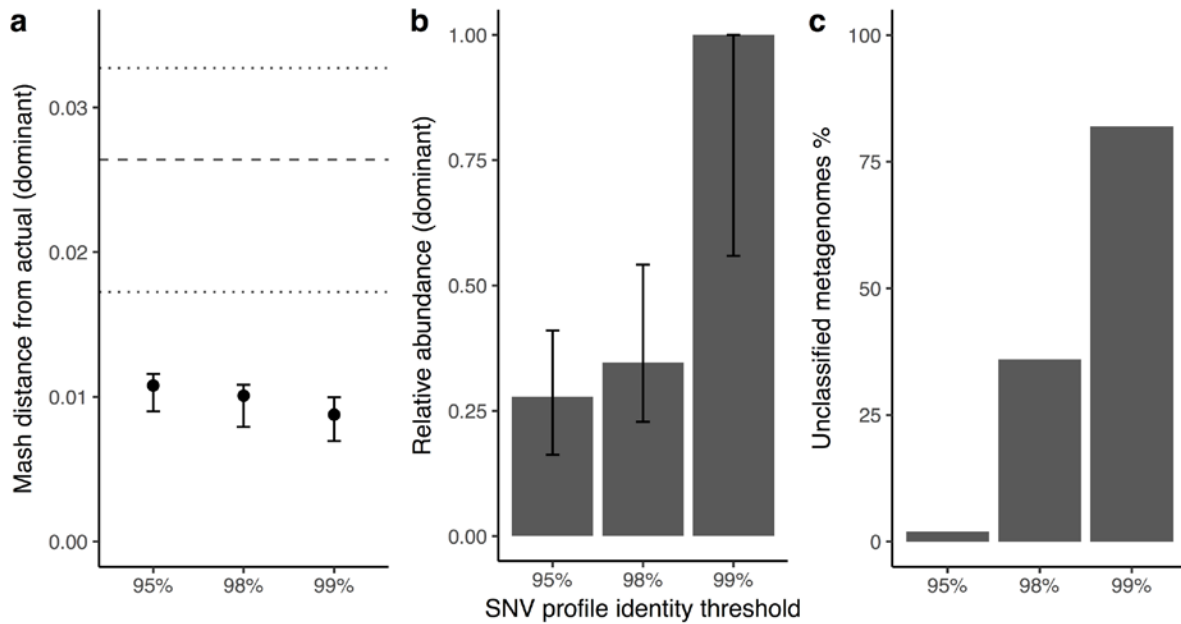

Supplementary Fig. 7. *LOO E. coli* dataset. Performances of StrainEst in the analysis of a metagenomic samples containing one strain that is absent from the reference database. Median mash distance between the predicted dominant *E. coli* strain and the actual (**a**), median estimated relative abundance of the dominant strain (**b**) and percentage of unclassified metagenomes (**c**) for three different SNV profile identity thresholds (parameter `-d/--max-ident-thr`). Error bars indicate the first and the third quartile. In all cases, StrainEst identified a dominant strain that was closely related to the actual. However, using the default value of the compatibility threshold StrainEst overestimated the sample complexity in an attempt to compensate for the missing strain. As the threshold increased, the accuracy of the prediction increased, but the number of predictable metagenomes decreased.

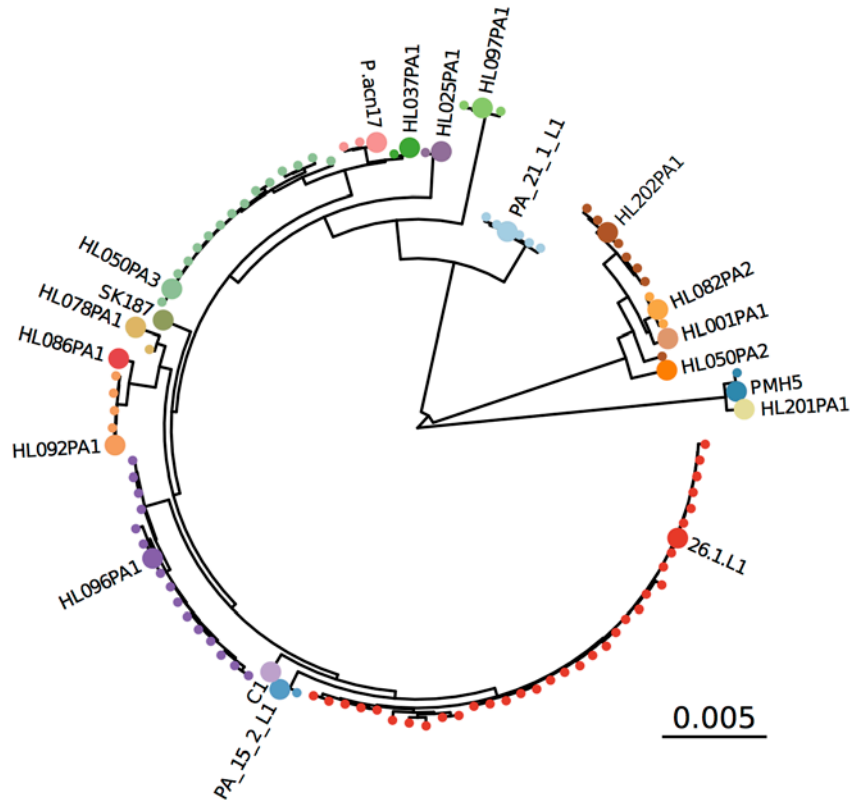

Supplementary Fig. 8. *P. acnes* Neighbor Joining tree using Mash distances. Large dots depict the representative strains after the SNV clustering steps. Colors indicates cluster membership.

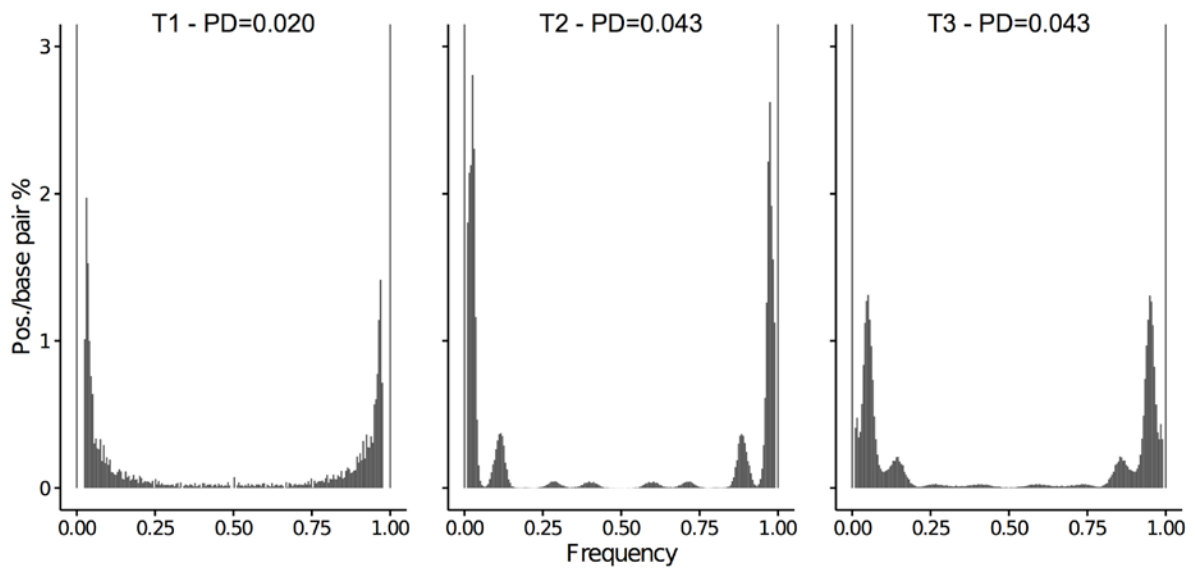

Supplementary Fig. 9. Frequency distribution of the allelic variants of *P. acnes* Subject HV01, Hp site for three different timepoints (T1,T2,T3). Transition from the low diversity (T1) to the high diversity (T2, T3) phenotype. In this example, the Phylogenetic Diversity increases from 0.02 (T1) to 0.043 (T2,T3). While the bi-modal frequency distribution of the allelic variants is indicative of the presence of a single strain at T1, multiple peaks appear at T2 and T3, supporting the presence of a more complex population. For clarity, the y-axis range is truncated at 3%.



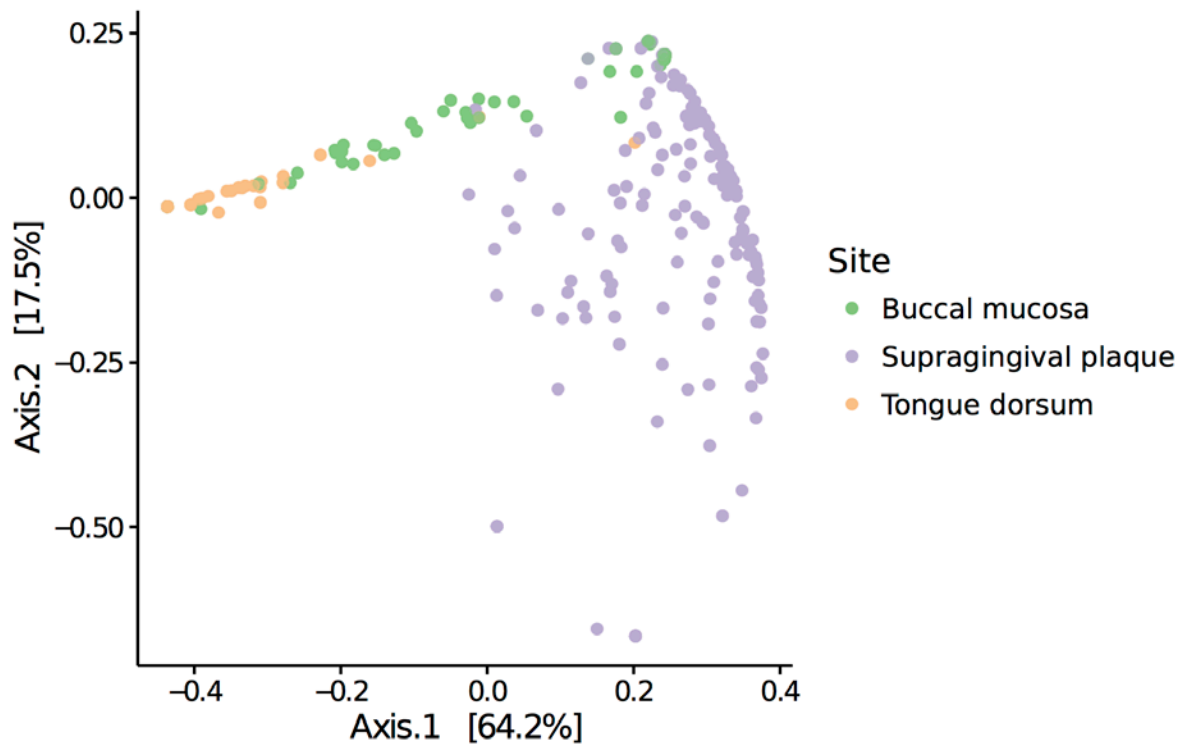

Supplementary Fig. 10. HMP oral dataset. Principal Coordinate Analysis (PCoA) using the Weighted UniFrac distances computed on the predicted relative abundances of species within the *Neisseria* genus and the phylogenetic tree estimated with the neighbor-joining method on the Mash distances. Samples with a reconstruction Pearson coefficient  $R < 0.8$  were removed from the analysis.

## Supplementary Tables

|                | JSD    |        | MCC    |        |
|----------------|--------|--------|--------|--------|
| Species        | Mean   | SD     | Mean   | SD     |
| B. longum      | 0.0306 | 0.0342 | 0.8922 | 0.1602 |
| E. coli        | 0.0132 | 0.0038 | 0.9786 | 0.0452 |
| E. faecalis    | 0.0080 | 0.0126 | 0.9862 | 0.0436 |
| P. acnes       | 0.0554 | 0.0448 | 0.6826 | 0.2562 |
| S. aureus      | 0.0482 | 0.0469 | 0.7816 | 0.2587 |
| S. epidermidis | 0.0353 | 0.0446 | 0.8413 | 0.2286 |
| S. pneumoniae  | 0.0224 | 0.0068 | 0.9492 | 0.0694 |

Supplementary Table 1. *syntheticIV* dataset (10X coverage). JSD and MCC between the actual and predicted strain composition. SD: standard deviation.

|                | JSD    |        | MCC    |        |
|----------------|--------|--------|--------|--------|
| Species        | Mean   | SD     | Mean   | SD     |
| B. longum      | 0.0024 | 0.0014 | 1.0000 | 0.0000 |
| E. coli        | 0.0072 | 0.0044 | 0.9893 | 0.0339 |
| E. faecalis    | 0.0015 | 0.0008 | 1.0000 | 0.0000 |
| P. acnes       | 0.0024 | 0.0017 | 1.0000 | 0.0000 |
| S. aureus      | 0.0063 | 0.0041 | 0.9655 | 0.0555 |
| S. epidermidis | 0.0028 | 0.0018 | 1.0000 | 0.0000 |
| S. pneumoniae  | 0.0103 | 0.0045 | 1.0000 | 0.0000 |

Supplementary Table 2. *syntheticIV* dataset (100X coverage). Same as Supplementary Table 1.

| Sample            | Species                | Nr. of aligned reads | Cov. SNV sites (min-max) | N. of covered SNV pos. | Representative sequence (predicted)                             | Strain designation  | Rel. ab. |
|-------------------|------------------------|----------------------|--------------------------|------------------------|-----------------------------------------------------------------|---------------------|----------|
| <b>SRR172 902</b> | <i>E. coli</i>         | 97288                | 1-3                      | 66268                  | GCF_000819325.1_Escherichia_coli_CVM_N3838_1PS_v1.0_genomic.fna | MG1655              | 68%      |
|                   | <i>N. meningitidis</i> | 128653               | 1-6                      | 21770                  | GCF_000327945.fna                                               | MC58                | 69%      |
|                   | <i>P. acnes</i>        | 255772               | 2-9                      | 100161                 | GCF_001469595.1_ASM146959v1_genomic.fna                         | DSM16379/K PA171202 | 100%     |
|                   | <i>S. aureus</i>       | 188498               | 2-8                      | 74392                  | GCF_000153665.1_ASM15366v1_genomic.fna                          | USA300_TCH 959      | 100%     |
|                   | <i>S. epidermidis</i>  | 252772               | 3-10                     | 92013                  | GCF_000007645.1_ASM764v1_genomic.fna                            | ATCC 12228          | 98%      |
| <b>SRR172 903</b> | <i>E. coli</i>         | 558192               | 3-10                     | 88130                  | GCF_000819325.1_Escherichia_coli_CVM_N3838_1PS_v1.0_genomic.fna | MG1655              | 68%      |
|                   | <i>N. meningitidis</i> | 12745                | 1-2                      | 4428                   | Not converged                                                   | NA                  | NA       |
|                   | <i>P. acnes</i>        | 19612                | 1-2                      | 29304                  | GCF_001469595.1_ASM146959v1_genomic.fna                         | DSM16379/K PA171202 | 100%     |
|                   | <i>S. aureus</i>       | 1490833              | 25-46                    | 70742                  | GCF_000153665.1_ASM15366v1_genomic.fna                          | USA300_TCH 959      | 99%      |
|                   | <i>S. epidermidis</i>  | 1227894              | 23-39                    | 87969                  | GCF_000007645.1_ASM764v1_genomic.fna                            | ATCC 12228          | 98%      |

Supplementary Table 3. Analysis of two Mock communities from the HMP project. For the two samples SRR172902 (even composition) and SRR172903 (staggered composition) we show the number of reads that align to the references, the coverage of the SNV positions (range, min-max), the number of covered SNV positions, the predicted dominant representative sequence, its strain designation and predicted relative abundance. Strain designation is determined by comparing the strain designation of the sequences included in the cluster represented by the sequence identified by StrainEst. With the exception of *S. aureus* and *S. epidermidis* in sample SRR172903, the coverage for all the species was always very low, never exceeding 10.

|            | Version    | Strain-level relative abundance profiling (reference-based) | Strain-level relative abundance profiling (denovo) | Dominant strain detection | Pangenome profiling | SNV profiling |
|------------|------------|-------------------------------------------------------------|----------------------------------------------------|---------------------------|---------------------|---------------|
| StrainEst  | 1.2        | YES                                                         | NO                                                 | YES                       | NO                  | YES           |
| PanPhlAn   | 1.2.0.6    | NO                                                          | NO                                                 | YES                       | YES                 | NO            |
| MIDAS      | 1.2.2      | NO                                                          | NO                                                 | NO                        | YES                 | YES           |
| ConStrains | 2016-04-20 | NO                                                          | YES                                                | NO                        | NO                  | YES           |
| PathoScope | 2.0.6      | YES                                                         | NO                                                 | YES                       | NO                  | NO            |
| Sigma      | 1.0.1      | YES                                                         | NO                                                 | YES                       | NO                  | YES           |

Supplementary Table 4. Analysis provided by StrainEst, PanPhlAn, MIDAS, ConStrains, PathoScope and Sigma. Both MIDAS and PanPhlAn provide a profile of the species pangenome present in metagenomic samples. ConStrains provides a denovo strain-level relative abundance profiling while StrainEst, PathoScope and Sigma perform a reference-based profiling.

| Filename          | Description                                                             |
|-------------------|-------------------------------------------------------------------------|
| GCF_000083565.fna | <i>Neisseria meningitidis</i> alpha14 (b-proteobacteria);alpha14        |
| GCF_000386625.fna | <i>Neisseria meningitidis</i> NM3144 (b-proteobacteria);NM3144          |
| GCF_000448005.fna | <i>Neisseria meningitidis</i> 96037 (b-proteobacteria);96037            |
| GCF_000293405.fna | <i>Neisseria meningitidis</i> 98008 (b-proteobacteria);98008            |
| GCF_000220865.fna | <i>Neisseria macacae</i> ATCC 33926 (b-proteobacteria);ATCC 33926       |
| GCF_000193755.fna | <i>Neisseria sicca</i> DS1 (b-proteobacteria);DS1                       |
| GCF_000156835.fna | <i>Neisseria gonorrhoeae</i> FA19 (b-proteobacteria);FA19               |
| GCF_000327805.fna | <i>Neisseria meningitidis</i> 63049 (b-proteobacteria);63049            |
| GCF_000193795.fna | <i>Neisseria lactamica</i> NS19 (b-proteobacteria);NS19                 |
| GCF_000193735.fna | <i>Neisseria sicca</i> 4320 (b-proteobacteria);4320                     |
| GCF_000191505.fna | <i>Neisseria meningitidis</i> M04-240196 (b-proteobacteria);M04-240196  |
| GCF_000387145.fna | <i>Neisseria meningitidis</i> 2003051 (b-proteobacteria);2003051        |
| GCF_000293465.fna | <i>Neisseria meningitidis</i> NM2657 (b-proteobacteria);NM2657          |
| GCF_000328005.fna | <i>Neisseria meningitidis</i> 98080 (b-proteobacteria);98080            |
| GCF_000328145.fna | <i>Neisseria meningitidis</i> NM126 (b-proteobacteria);NM126            |
| GCF_000176735.fna | <i>Neisseria polysaccharea</i> ATCC 43768 (b-proteobacteria);ATCC 43768 |
| GCF_000327785.fna | <i>Neisseria meningitidis</i> 65014 (b-proteobacteria);65014            |
| GCF_000191325.fna | <i>Neisseria meningitidis</i> 961-5945 (b-proteobacteria);961-5945      |
| GCF_000293385.fna | <i>Neisseria meningitidis</i> NM576 (b-proteobacteria);NM576            |
| GCF_000327885.fna | <i>Neisseria meningitidis</i> NM174 (b-proteobacteria);NM174            |
| GCF_000386805.fna | <i>Neisseria meningitidis</i> 2002020 (b-proteobacteria);2002020        |
| GCF_000386965.fna | <i>Neisseria meningitidis</i> 2004032 (b-proteobacteria);2004032        |
| GCF_000328105.fna | <i>Neisseria meningitidis</i> 2004090 (b-proteobacteria);2004090        |
| GCF_000386265.fna | <i>Neisseria meningitidis</i> 63023 (b-proteobacteria);63023            |
| GCF_000156975.fna | <i>Neisseria gonorrhoeae</i> SK-93-1035 (b-proteobacteria);SK-93-1035   |
| GCF_000448185.fna | <i>Neisseria meningitidis</i> NM518 (b-proteobacteria);NM518            |
| GCF_000327945.fna | <i>Neisseria meningitidis</i> M13255 (b-proteobacteria);M13255          |
| GCF_000327865.fna | <i>Neisseria meningitidis</i> 9506 (b-proteobacteria);9506              |
| GCF_000260655.fna | <i>Neisseria sicca</i> VK64 (b-proteobacteria);VK64                     |
| GCF_000293265.fna | <i>Neisseria meningitidis</i> 93003 (b-proteobacteria);93003            |
| GCF_000191465.fna | <i>Neisseria meningitidis</i> M01-240149 (b-proteobacteria);M01-240149  |
| GCF_000386945.fna | <i>Neisseria meningitidis</i> 2001001 (b-proteobacteria);2001001        |
| GCF_000173995.fna | <i>Neisseria lactamica</i> ATCC 23970 (b-proteobacteria);ATCC 23970     |
| GCF_000090875.fna | <i>Neisseria</i> sp. oral taxon 014 str. F0314 (b-proteobacteria);F0314 |
| GCF_000174655.fna | <i>Neisseria sicca</i> ATCC 29256 (b-proteobacteria);ATCC 29256         |
| GCF_000386765.fna | <i>Neisseria meningitidis</i> 73704 (b-proteobacteria);73704            |
| GCF_000173955.fna | <i>Neisseria subflava</i> NJ9703 (b-proteobacteria);NJ9703              |
| GCF_000293245.fna | <i>Neisseria meningitidis</i> 93004 (b-proteobacteria);93004            |
| GCF_000191485.fna | <i>Neisseria meningitidis</i> M01-240355 (b-proteobacteria);M01-240355  |
| GCF_000191265.fna | <i>Neisseria meningitidis</i> M0579 (b-proteobacteria);M0579            |
| GCF_000186165.fna | <i>Neisseria mucosa</i> C102 (b-proteobacteria);C102                    |
| GCF_000191245.fna | <i>Neisseria meningitidis</i> M13399 (b-proteobacteria);M13399          |
| GCF_000196295.fna | <i>Neisseria lactamica</i> 020-06 (b-proteobacteria);020-06             |

|                   |                                                                                              |
|-------------------|----------------------------------------------------------------------------------------------|
| GCF_000146655.fna | <i>Neisseria meningitidis</i> ATCC 13091 (b-proteobacteria);ATCC 13091                       |
| GCF_000173875.fna | <i>Neisseria mucosa</i> ATCC 25996 (b-proteobacteria);ATCC 25996                             |
| GCF_000448165.fna | <i>Neisseria meningitidis</i> NM0552 (b-proteobacteria);NM0552                               |
| GCF_000173935.fna | <i>Neisseria flavescens</i> NRL30031/H210 (b-proteobacteria);NRL30031/H210                   |
| GCF_000176755.fna | <i>Neisseria elongata</i> subsp. <i>glycolytica</i> ATCC 29315 (b-proteobacteria);ATCC 29315 |
| GCF_000328045.fna | <i>Neisseria meningitidis</i> 77221 (b-proteobacteria);77221                                 |
| GCF_000006845.fna | <i>Neisseria gonorrhoeae</i> FA 1090 (b-proteobacteria);FA 1090                              |
| GCF_000173895.fna | <i>Neisseria cinerea</i> ATCC 14685 (b-proteobacteria);ATCC 14685                            |
| GCF_000293285.fna | <i>Neisseria meningitidis</i> NM255 (b-proteobacteria);NM255                                 |
| GCF_000448085.fna | <i>Neisseria meningitidis</i> NM045 (b-proteobacteria);NM045                                 |
| GCF_000014105.fna | <i>Neisseria meningitidis</i> 053442 (b-proteobacteria);053442                               |
| GCF_000386685.fna | <i>Neisseria meningitidis</i> NM51 (b-proteobacteria);NM51                                   |
| GCF_000293625.fna | <i>Neisseria meningitidis</i> NM2795 (b-proteobacteria);NM2795                               |
| GCF_000293665.fna | <i>Neisseria meningitidis</i> NM3001 (b-proteobacteria);NM3001                               |
| GCF_000156875.fna | <i>Neisseria gonorrhoeae</i> PID18 (b-proteobacteria);PID18                                  |
| GCF_000227275.fna | <i>Neisseria</i> sp. GT4A_CT1 (b-proteobacteria);GT4A_CT1                                    |
| GCF_000448225.fna | <i>Neisseria meningitidis</i> NM3230 (b-proteobacteria);NM3230                               |
| GCF_000175275.fna | <i>Neisseria flavescens</i> SK114 (b-proteobacteria);SK114                                   |
| GCF_000194925.fna | <i>Neisseria bacilliformis</i> ATCC BAA-1200 (b-proteobacteria);ATCC BAA-1200                |
| GCF_000367485.fna | <i>Neisseria meningitidis</i> NMB (b-proteobacteria);NMB                                     |
| GCF_000386745.fna | <i>Neisseria meningitidis</i> 73696 (b-proteobacteria);73696                                 |
| GCF_000191425.fna | <i>Neisseria meningitidis</i> G2136 (b-proteobacteria);G2136                                 |
| GCF_000293445.fna | <i>Neisseria meningitidis</i> 92045 (b-proteobacteria);92045                                 |
| GCF_000191205.fna | <i>Neisseria meningitidis</i> OX99.30304 (b-proteobacteria);OX99.30304                       |
| GCF_000240545.fna | <i>Neisseria meningitidis</i> Nm8187 (b-proteobacteria);Nm8187                               |
| GCF_000156775.fna | <i>Neisseria gonorrhoeae</i> 35/02 (b-proteobacteria);35/02                                  |
| GCF_000387105.fna | <i>Neisseria meningitidis</i> 2005172 (b-proteobacteria);2005172                             |
| GCF_000448065.fna | <i>Neisseria meningitidis</i> NM3139 (b-proteobacteria);NM3139                               |
| GCF_000026965.fna | <i>Neisseria meningitidis</i> 8013 (b-proteobacteria);8013                                   |
| GCF_000386785.fna | <i>Neisseria meningitidis</i> 81858 (b-proteobacteria);81858                                 |
| GCF_000413215.fna | <i>Neisseria meningitidis</i> NM134 (b-proteobacteria);NM134                                 |
| GCF_000191345.fna | <i>Neisseria meningitidis</i> M01-240013 (b-proteobacteria);M01-240013                       |
| GCF_000293425.fna | <i>Neisseria meningitidis</i> 80179 (b-proteobacteria);80179                                 |
| GCF_000327745.fna | <i>Neisseria meningitidis</i> 69096 (b-proteobacteria);69096                                 |
| GCF_000318235.fna | <i>Neisseria</i> sp. oral taxon 020 str. F0370 (b-proteobacteria);F0370                      |
| GCF_000293645.fna | <i>Neisseria meningitidis</i> NM3081 (b-proteobacteria);NM3081                               |

Supplementary Table 5. 79 *Neisseriae* genomes used as reference in the analysis of the HMP oral dataset.

| Species                 | # of downloaded genomes | Representative genomes selection |                    | Reference SNV matrix        |                   |          |
|-------------------------|-------------------------|----------------------------------|--------------------|-----------------------------|-------------------|----------|
|                         |                         | Mash dist. thr.                  | # of repr. genomes | Species repr.               | # of ref. genomes | # of SNV |
| <i>B. longum</i>        | 47                      | 0.001                            | 30                 | NCC2705                     | 29                | 99406    |
| <i>E. faecalis</i>      | 416                     | 0.001                            | 264                | V583                        | 117               | 109312   |
| <i>P. acnes</i>         | 110                     | 0.001                            | 25                 | KPA171202                   | 20                | 115521   |
| <i>S. aureus</i>        | 5413                    | 0.001                            | 761                | NCTC 8325                   | 52                | 86365    |
| <i>S. epidermidis</i>   | 278                     | 0.001                            | 146                | ATCC 12228                  | 67                | 107194   |
| <i>Escherichia coli</i> | 3041                    | 0.006                            | 544                | K-12 substr. MG1655         | 278               | 104248   |
| Neisseriae              | 212                     | 0.004                            | 85                 | Neisseria meningitidis MC58 | 79                | 25393    |

Supplementary Table 6. Selection of the representative genomes for SNV profiling. The Mash distance threshold from the species representative is the threshold used for the preliminary clustering from the pairwise Mash distance matrix (see Fig. 1a, main text). This clustering yields a set of representative genomes that are aligned against the species representative using NUCmer to identify the core genome and the set of SNVs. Reference SNV profiles are finally clustered obtaining the SNV matrix used in the modeling step (see Fig. 1b and 1c, main text).

| <b>Species</b>          | <b>Q<sub>1</sub></b> | <b>Q<sub>2</sub> (median)</b> | <b>Q<sub>3</sub></b> |
|-------------------------|----------------------|-------------------------------|----------------------|
| <i>B. longum</i>        | 80.9375              | 82.3550                       | 82.9575              |
| <i>E. faecalis</i>      | 87.0450              | 89.0950                       | 89.9650              |
| <i>P. acnes</i>         | 94.4075              | 96.1950                       | 96.5050              |
| <i>S. aureus</i>        | 87.3125              | 88.4750                       | 89.8750              |
| <i>S. epidermidis</i>   | 89.3575              | 91.4450                       | 92.5325              |
| <i>S. pneumoniae</i>    | 84.1775              | 85.7600                       | 89.0325              |
| <i>Escherichia coli</i> | 79.1075              | 81.1150                       | 81.7625              |

Supplementary Table 7. *syntheticIV* dataset (100X): alignment rates (*i.e.*percentage of aligned reads) against a database including 10 representative sequences. Q<sub>1</sub>: first quartile, Q<sub>2</sub>: median, Q<sub>3</sub>: third quartile. For all species, the choice of 10 reference sequences guarantees that at least 80% of the reads are aligned. The number of reference sequences can be increased to improve sensitivity.



| Species               | # of ref. genomes in the SNV matrix | # of SNV | Coverage | Running time [sec] | Maximum memory occupied [MB] |
|-----------------------|-------------------------------------|----------|----------|--------------------|------------------------------|
| <i>B. longum</i>      | 29                                  | 99406    | 10       | 781                | 129                          |
|                       |                                     |          | 20       | 1081               | 130                          |
|                       |                                     |          | 50       | 841                | 129                          |
|                       |                                     |          | 100      | 1141               | 129                          |
| <i>S. aureus</i>      | 52                                  | 86365    | 10       | 721                | 154                          |
|                       |                                     |          | 20       | 781                | 154                          |
|                       |                                     |          | 50       | 901                | 235                          |
|                       |                                     |          | 100      | 961                | 231                          |
| <i>S. epidermidis</i> | 67                                  | 107194   | 10       | 1201               | 437                          |
|                       |                                     |          | 20       | 901                | 447                          |
|                       |                                     |          | 50       | 1141               | 438                          |
|                       |                                     |          | 100      | 1502               | 438                          |
| <i>E. faecalis</i>    | 117                                 | 109312   | 10       | 1081               | 406                          |
|                       |                                     |          | 20       | 1141               | 591                          |
|                       |                                     |          | 50       | 1261               | 446                          |
|                       |                                     |          | 100      | 1382               | 453                          |

Supplementary Table 8. Execution time and maximum required memory by the modeling step (command `strainest est`) for four *syntheticII* samples. StrainEst was run on a desktop machine with an Intel® Core™ i7-3770, 4 cores and 16 GB of RAM.

## Supplementary Methods

### Comparison to existing tools

To compare the performances of StrainEst to existing tools, we run ConStrains, PanPhlAn, PathoScope, Sigma, and Bowtie 2 on the 50 independent samples of the *syntheticEcoli* dataset.

### ConStrains

ConStrains (version 2016-04-20) was run using the default parameters and MetaPhlAn2 version 2.6.0:

```
ConStrains.py -m metaphlan2.py -c sample.conf -o output
```

### PanPhlAn

We downloaded the *E. coli* pangenome database from

<https://bitbucket.org/CibioCM/panphlan/wiki/Pangenome%20databases>.

Metagenomic samples were mapped against the *E. coli* pangenome using PanPhlAn version 1.2.0.6:

```
cat read1.fastq read2.fastq > read.fastq
panphlan_map.py -c ecoli16 --i_bowtie2_indexes \
    $BOWTIE2_INDEXES -i read.fastq -o map_results/output.csv
```

For each *E. coli* dataset (2, 3 and 4 strains) the mapping results were merged and processed for getting the final gene-family presence/absence profile matrix:

```
panphlan_profile.py -c ecoli16 -i map_results \
    --i_bowtie2_indexes $BOWTIE2_INDEXES --o_dna \
    result_gene_presence_absence.csv
```

The dominant strain was determined as the strain with the minimum Jaccard distance between gene family profiles of the reference strains and the metagenome.

## PathoScope

We downloaded the nt\_02\_04\_2016\_ti.fa reference database from `ftp://pathoscope.bumc.bu.edu/data/` and created a *E. coli* specific PathoScope (version 2.0.6) database with the command:

```
python pathoscope2.py LIB -genomeFile nt_02_04_2016_ti.fa \  
    -taxonIds 562 --subTax -outPrefix E_coli
```

for each sample dataset we then run the mapping step:

```
python pathoscope2.py MAP -1 read1.fastq -2 read2.fastq \  
    -targetRefFiles E_coli_ti.fa -outDir results_sample \  
    -outAlign sample.bam -expTag sample
```

and then the prediction step using the informative prior<sup>12</sup>:

```
pathoscope2.py ID -alignFile sample.bam -fileType sam \  
    -outDir results_sample -expTag sample -thetaPrior 10**88
```

## Sigma

Sigma (version 1.0.1) was run using the default configuration file. The Sigma reference genome database was constructed from the complete set of 287 reference genomes used by StrainEst:

```
sigma-index-genomes -c sigma_config.cfg
```

After that, metagenomic reads were aligned against the reference database and the probabilistic model was built and solved:

```
sigma-align-reads -c sigma_config.cfg -w output_dir  
sigma-build-model -c sigma_config.cfg -w output_dir  
sigma-solve-model -c sigma_config.cfg -w output_dir -i \  
    output_dir/sigma_out.qmatrix.txt
```

## Bowtie2

The Bowtie2 (version 2.2.9) index was built from the complete set of 287 *E. coli* reference genomes used by StrainEst. For each metagenome, a Bowtie2 alignment against the references was performed. Reads with a mapping quality score (MAPQ) <10 were removed and the read counts for each reference sequence were finally extracted:

```
bowtie2 --no-unal -x ecoli -1 read1.fasta -2 read2.fasta \  
-S bowtie2_out_tmp.sam  
samtools view -b bowtie2_out_tmp.sam > bowtie2_out_tmp.bam  
samtools view -b -q 10 bowtie2_out_tmp.bam > bowtie2_out.bam  
samtools sort bowtie2_out.bam -o bowtie2_out_sorted.bam  
samtools index bowtie2_out_sorted.bam  
samtools idxstats bowtie2_out_sorted.bam > counts.txt
```

For each metagenomic sample, the dominant strain and the secondary components were determined naively ranking the 278 reference genomes according the number of aligned reads.
