# Supplementary material for: Strain profiling and epidemiology of bacterial species from metagenomic sequencing
Source: PubMed Central journal article supplement (PMC5741664; doi:10.1038/s41467-017-02209-5), 2017-12-22
Supplement: 41467_2017_2209_MOESM2_ESM.pdf [file 41467_2017_2209_MOESM2_ESM.pdf]

## Description of Additional Supplementary File

File Name: Supplementary Data 1

Description: Prediction accuracy in terms of Mash distances and relative abundance estimation between the actual and the predicted strains of Bowtie2, PanPhlAn, PathoScope and StrainEst on the *syntheticEcoli* dataset.
